# Supplementary material
Source: PubMed Central journal article supplement (PMC10153796)
Supplement: NIHMS1883681-supplement-36868449_supplementary_materials.pdf [file NIHMS1883681-supplement-36868449_supplementary_materials.pdf]

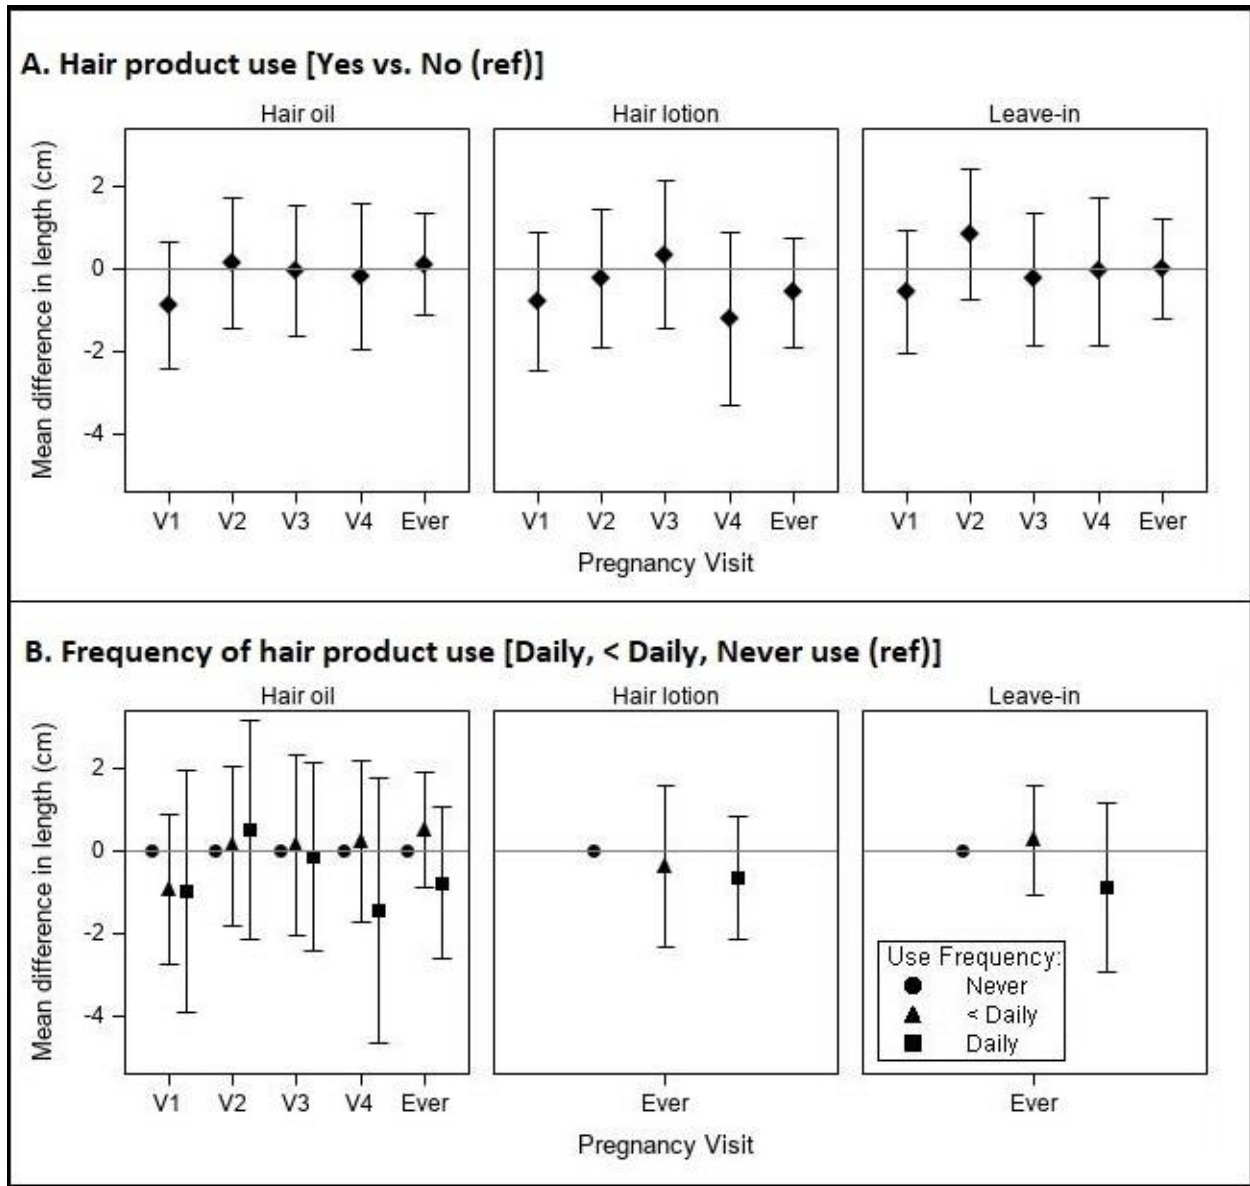

**Figure S1.** Covariate-adjusted differences in mean birth length (cm) associated with hair product use (A) and use frequency (B) within the month prior to each pregnancy study visit (n= 164\*). \*Due to missing frequency data at individual time points the sample sizes range from n=149 to n=164. “Ever” use categories represent report of daily use or less than daily use at one or more pregnancy visits compared to “never” users.

**Table S1.** Participant characteristics of included (n=164) and excluded (n=11) study participants

| Characteristic/outcome                 | Included (n=164) |                       | Excluded (n=11) |                       |
|----------------------------------------|------------------|-----------------------|-----------------|-----------------------|
|                                        | n                | mean $\pm$ SD<br>or % | n               | mean $\pm$ SD<br>or % |
| <b><i>Parental characteristics</i></b> |                  |                       |                 |                       |
| Age at consent (years)                 | 164              | 32.5 $\pm$ 4.4        | 11              | 31.7 $\pm$ 4.1        |
| BMI at visit 1 (kg/m <sup>2</sup> )    | 164              | 25.6 $\pm$ 5.3        | 10              | 26.5 $\pm$ 5.4        |
| Bachelor's degree or higher            | 130              | 79%                   | 5               | 83%                   |
| Missing                                | -                | -                     | 5               | -                     |
| Race and ethnicity                     |                  |                       |                 |                       |
| Non-Hispanic White                     | 101              | 62%                   | 3               | 37.5%                 |
| Non-Hispanic Black                     | 18               | 11%                   | 1               | 12.5%                 |
| Hispanic                               | 13               | 8%                    | 1               | 12.5%                 |
| "Other" race                           | 32               | 19%                   | 3               | 37.5%                 |
| Missing                                | -                | -                     | 3               | -                     |
| Parity                                 |                  |                       |                 |                       |
| 0                                      | 84               | 51%                   | 6               | 86%                   |
| 1                                      | 51               | 31%                   | 1               | 14%                   |
| 2+                                     | 29               | 18%                   | 0               | 0%                    |
| Missing                                | -                | -                     | 4               | -                     |

**Table S2.** Sensitivity analysis of covariate-adjusted<sup>a</sup> differences in mean birth outcomes in product users compared to non-users in the 48 hours prior to each pregnancy study visit (n=146)<sup>b</sup> – excluding non-Hispanic Black participants<sup>c</sup>

| Product                   | Visit <sup>d</sup> | Gestational Age (days) | Birth Length (cm) | BW-for-GA Z-score    |
|---------------------------|--------------------|------------------------|-------------------|----------------------|
|                           |                    | Beta (95% CI)          | Beta (95% CI)     | Beta (95% CI)        |
| Deodorant                 | 1                  | -1.0 (-8.0, 6.0)       | 0.2 (-1.9, 2.2)   | 0.38 (-0.13, 0.90)   |
|                           | 2                  | 1.4 (-5.44, 8.2)       | 0.4 (-1.6, 2.4)   | 0.38 (-0.13, 0.89)   |
|                           | 3                  | -0.4 (-5.0, 4.3)       | 0.3 (-1.7, 2.2)   | 0.17 (-0.29, 0.62)   |
|                           | 4                  | 0.1 (-4.7, 4.9)        | 0.1 (-2.1, 2.2)   | 0.22 (-0.27, 0.71)   |
|                           | Ever               | ---                    | ---               | ---                  |
| Hair gel/spray            | 1                  | -3.4 (-8.4, 1.6)       | 0.3 (-1.2, 1.8)   | -0.03 (-0.41, 0.35)  |
|                           | 2                  | -2.6 (-7.8, 2.6)       | -0.2 (-1.8, 1.3)  | -0.18 (-0.57, 0.21)  |
|                           | 3                  | 1.8 (-2.1, 5.6)        | 0.7 (-1.0, 2.4)   | 0.10 (-0.28, 0.48)   |
|                           | 4                  | 2.9 (-0.6, 6.5)        | 0.2 (-1.4, 1.8)   | -0.30 (-0.66, 0.07)  |
|                           | Ever               | 0.4 (-3.9, 4.8)        | 0.4 (-0.9, 1.7)   | -0.13 (-0.47, 0.20)  |
| Conditioner               | 1                  | -0.4 (-7.1, 6.3)       | -0.8 (-2.2, 0.6)  | -0.26 (-0.75, 0.23)  |
|                           | 2                  | 0.05 (-5.4, 5.5)       | 1.6 (0.1, 3.2)    | 0.05 (-0.36, 0.46)   |
|                           | 3                  | -0.08 (-3.8, 3.6)      | -1.2 (-2.7, 0.3)  | -0.29 (-0.65, 0.07)  |
|                           | 4                  | 1.6 (-2.1, 5.4)        | -1.0 (-2.6, 0.7)  | -0.22 (-0.61, 0.16)  |
|                           | Ever               | ---                    | ---               | ---                  |
| Shampoo                   | 1                  | -0.4 (-9.5, 8.6)       | 0.01 (-1.9, 1.9)  | 0.21 (-0.46, 0.87)   |
|                           | 2                  | -0.7 (-7.6, 6.1)       | 2.9 (1.0, 4.9)    | 0.52 (0.01, 1.03)    |
|                           | 3                  | 1.1 (-3.2, 5.5)        | -1.0 (-2.8, 0.8)  | -0.005 (-0.43, 0.42) |
|                           | 4                  | 0.8 (-4.1, 5.6)        | 0.6 (-1.5, 2.7)   | 0.15 (-0.35, 0.65)   |
|                           | Ever               | ---                    | ---               | ---                  |
| Bar soap                  | 1                  | 3.4 (-1.2, 8.0)        | -0.9 (-2.3, 0.5)  | -0.24 (-0.59, 0.11)  |
|                           | 2                  | 4.2 (-0.3, 8.8)        | -0.6 (-2.0, 0.8)  | -0.10 (-0.45, 0.25)  |
|                           | 3                  | 2.8 (-0.2, 5.9)        | -0.7 (-2.0, 0.6)  | -0.23 (-0.53, 0.07)  |
|                           | 4                  | 1.8 (-1.4, 5.0)        | -0.6 (-2.0, 0.8)  | -0.05 (-0.38, 0.27)  |
|                           | Ever               | 4.5 (-0.1, 9.1)        | -0.2 (-1.6, 1.2)  | -0.15 (-0.51, 0.21)  |
| Liquid soap/<br>body wash | 1                  | -2.5 (-10.7, 5.7)      | -1.2 (-3.6, 1.2)  | -0.23 (-0.84, 0.38)  |
|                           | 2                  | -4.2 (-11.4, 3.1)      | -1.3 (-3.5, 0.8)  | -0.24 (-0.79, 0.31)  |
|                           | 3                  | -4.0 (-8.7, 0.8)       | 1.2 (-0.9, 3.2)   | 0.01 (-0.46, 0.48)   |
|                           | 4                  | -0.3 (-5.2, 4.6)       | 3.4 (1.4, 5.5)    | 0.13 (-0.38, 0.63)   |
|                           | Ever               | ---                    | ---               | ---                  |
| Lotion                    | 1                  | -0.9 (-6.9, 5.1)       | 1.2 (-0.5, 3.0)   | 0.51 (0.08, 0.94)    |
|                           | 2                  | 2.4 (-3.9, 8.7)        | 0.2 (-1.7, 2.0)   | 0.06 (-0.41, 0.53)   |
|                           | 3                  | 2.4 (-1.7, 6.5)        | 0.6 (-1.2, 2.3)   | 0.23 (-0.18, 0.63)   |
|                           | 4                  | 2.2 (-2.3, 6.7)        | 0.4 (-1.6, 2.4)   | 0.13 (-0.34, 0.60)   |
|                           | Ever               | ---                    | ---               | ---                  |
| Shave cream               | 1                  | -3.4 (-8.8, 1.9)       | -1.9 (-3.5, -0.4) | -0.07 (-0.47, 0.33)  |
|                           | 2                  | -2.4 (-8.0, 3.2)       | -1.5 (-3.2, 0.1)  | 0.03 (-0.39, 0.46)   |
|                           | 3                  | -1.4 (-5.4, 2.6)       | -0.7 (-2.4, 0.9)  | -0.07 (-0.47, 0.32)  |
|                           | 4                  | -0.6 (-4.7, 3.5)       | -1.8 (-3.4, 0.0)  | 0.12 (-0.29, 0.54)   |
|                           | Ever               | -3.2 (-7.8, 1.4)       | -1.5 (-2.9, -0.2) | -0.14 (-0.50, 0.21)  |
| Perfume                   | 1                  | 0.3 (-4.7, 5.3)        | 0.5 (-1.0, 2.0)   | 0.07 (-0.30, 0.44)   |
|                           | 2                  | 0.5 (-4.6, 5.5)        | 0.05 (-1.4, 1.5)  | -0.12 (-0.50, 0.27)  |
|                           | 3                  | -2.3 (-5.8, 1.3)       | 0.01 (-1.5, 1.5)  | -0.22 (-0.57, 0.14)  |
|                           | 4                  | -0.9 (-4.5, 2.8)       | 1.0 (-0.6, 2.6)   | 0.12 (-0.25, 0.49)   |
|                           | Ever               | -0.2 (-4.9, 4.5)       | 0.8 (-0.6, 2.2)   | 0.06 (-0.30, 0.43)   |
| Nail polish               | 1                  | -0.2 (-5.4, 5.1)       | 1.1 (-0.4, 2.7)   | 0.28 (-0.11, 0.66)   |
|                           | 2                  | 2.2 (-3.5, 7.8)        | 0.5 (-1.1, 2.2)   | 0.10 (-0.33, 0.52)   |
|                           | 3                  | -0.6 (-4.9, 3.6)       | 0.6 (-1.2, 2.4)   | -0.19 (-0.61, 0.23)  |
|                           | 4                  | -0.1 (-3.7, 3.6)       | 0.3 (-1.3, 1.9)   | 0.15 (-0.22, 0.52)   |
|                           | Ever               | 2.0 (-2.5, 6.4)        | 1.3 (-0.01, 2.6)  | 0.21 (-0.13, 0.55)   |

<sup>a</sup>Adjusted for parental participant age at consent (years), BMI at visit 1 (kg/m<sup>2</sup>), bachelor's degree or higher (yes vs. no), and parity (0, 1, 2+)

<sup>b</sup>Due to missing data at some time points the sample size ranges from n=134 to n=146

<sup>c</sup>n=18 non-Hispanic Black participants

<sup>d</sup>The "Ever" timepoint represents combined use data from all 4 pregnancy study visits

**Table S3.** Sensitivity analysis of covariate-adjusted<sup>a</sup> differences in mean birth outcomes in hair product users compared to non-users in the month prior to each pregnancy visit (n=146)<sup>b</sup> – excluding non-Hispanic Black participants<sup>c</sup>

| Product     | Visit <sup>d</sup> | Birth length (cm) | BW-for-GA Z-score    |
|-------------|--------------------|-------------------|----------------------|
|             |                    | Beta (95% CI)     | Beta (95% CI)        |
| Hair oil    | 1                  | -0.4 (-2.2, 1.4)  | -0.46 (-0.90, -0.02) |
|             | 2                  | 0.3 (-1.4, 2.1)   | 0.07 (-0.38, 0.52)   |
|             | 3                  | 0.6 (-1.2, 2.5)   | -0.11 (-0.53, 0.30)  |
|             | 4                  | 0.2 (-1.8, 2.2)   | -0.28 (-0.74, 0.17)  |
|             | Ever               | 0.6 (-0.8, 1.9)   | -0.02 (-0.38, 0.34)  |
| Hair lotion | 1                  | -0.7 (-2.6, 1.3)  | -0.42 (-0.90, 0.07)  |
|             | 2                  | -0.6 (-2.5, 1.2)  | -0.10 (-0.58, 0.38)  |
|             | 3                  | 0.9 (-1.3, 3.1)   | -0.03 (-0.53, 0.47)  |
|             | 4                  | -0.7 (-3.0, 1.7)  | -0.22 (-0.75, 0.31)  |
|             | Ever               | -0.4 (-1.8, 1.1)  | -0.18 (-0.57, 0.20)  |
| Leave-in    | 1                  | -0.5 (-2.2, 1.2)  | -0.18 (-0.60, 0.23)  |
|             | 2                  | 0.9 (-0.9, 2.6)   | 0.03 (-0.42, 0.48)   |
|             | 3                  | 0.3 (-1.6, 2.1)   | -0.32 (-0.75, 0.10)  |
|             | 4                  | -0.2 (-2.1, 1.7)  | -0.35 (-0.78, 0.08)  |
|             | Ever               | 0.3 (-1.1, 1.6)   | 0.02 (-0.33, 0.36)   |

<sup>a</sup>Adjusted for parental participant age at consent (years), BMI at visit 1 (kg/m<sup>2</sup>), bachelor's degree or higher (yes vs. no), and parity (0, 1, 2+)

<sup>b</sup>Due to missing data at some time points the sample size ranges from n=134 to n=146

<sup>c</sup>n=18 non-Hispanic Black participants

<sup>d</sup>The "Ever" timepoint represents combined use data from all 4 pregnancy study visits
